# Supplementary material for: Polypyrrole with Embedded Carbide-Derived Carbon with and without Phosphor Tungsten Acid: Linear Actuation and Energy Storage
Source: MDPI journal article supplement (doi:10.3390/polym14214757), 2022-11-06
Supplement: s1 [file s1]

## Supplementary

### Polypyrrole with Embedded Carbide-Derived Carbon with and without Phosphor Tungsten Acid: Linear Actuation and Energy Storage

Zane Zondaka <sup>1</sup>, Quoc Bao Le <sup>2</sup> and Rudolf Kiefer <sup>2,\*</sup>

<sup>1</sup> Intelligent Materials and Systems Lab, Institute of Technology, University of Tartu, Nooruse 1, 50411 Tartu, Estonia

<sup>2</sup> Conducting Polymers in Composites and Applications Research Group, Faculty of Applied Sciences, Ton Duc Thang University, Ho Chi Minh City 700000, Vietnam

\* Correspondence: rudolf.kiefer@tdtu.edu.vn; Tel.: +84-784566419

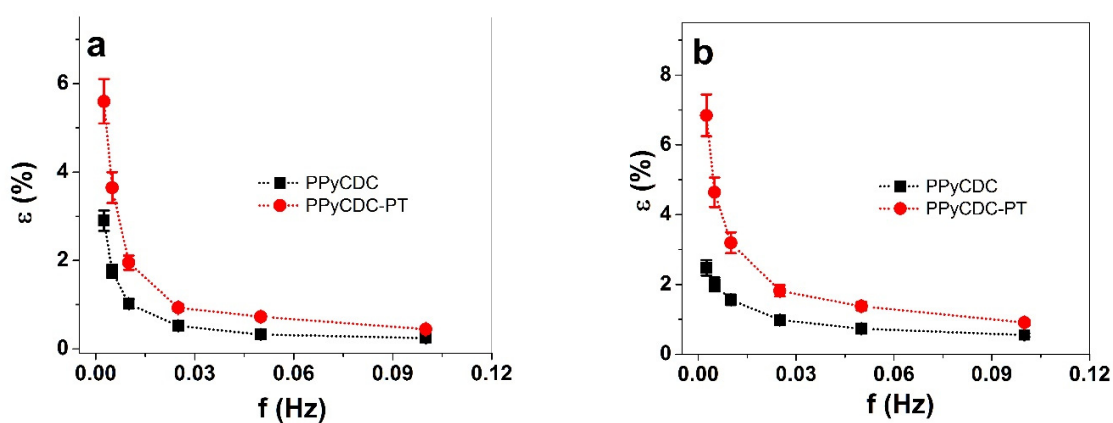

**Figure S1.** Square wave potential steps of PPyCDC (■) and PPyCDC-PT (●) at applied at applied potential range 0.8V to -0.5V showing strain against frequencies (0.0025Hz to 0.1Hz) using LiTFSI salt in a: propylene carbonate and b: aqueous solvents.
